# Supplementary material for: Bandwidth and power allocation for cooperative relay in cognitive radio networks
Source: Springer Nature journal article supplement (doi:10.1186/1687-6180-2012-224), 2012-10-22

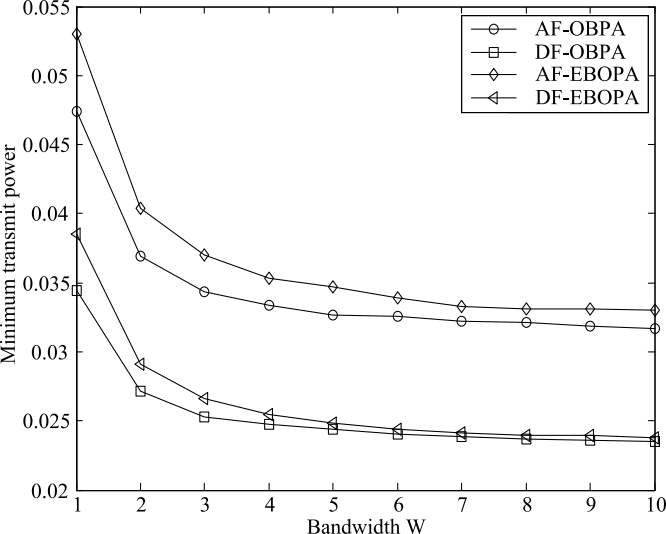

Supplement: 13634_2011_372_MOESM5_ESM.pdf [file 13634_2011_372_MOESM5_ESM.pdf]
